# Supplementary material
Source: MDPI journal article supplement (https://www.mdpi.com/2071-1050/14/16/9880)
Supplement: s1 [file s1 › sustainability-1839115-supplementary.pdf]

# Adapting to Social-ecological Risks to the Conservation of a Muskmelon Landrace in India

Anshuman Singh, Ranjay K. Singh, Neeraj Kumar, Suresh Kumar, Parvender Sheoran, Dheeraj Singh, Satyendra Kumar and P. C. Sharma

Journal: Sustainability (MDPI)

**Table S1.** Measurement of the socio-economic profile of the muskmelon growers.

| Variable             | Definition                                                                | Value/description                                         | Score |
|----------------------|---------------------------------------------------------------------------|-----------------------------------------------------------|-------|
| Age                  | Chronological age (y) as on date of interview                             | <50                                                       | 1     |
|                      |                                                                           | 51 to 60                                                  | 2     |
|                      |                                                                           | >61                                                       | 3     |
| Experience           | Years of engagement with muskmelon cultivation                            | 10-25                                                     | 1     |
|                      |                                                                           | 26-40                                                     | 2     |
|                      |                                                                           | >41                                                       | 3     |
| Education            | Formal schooling/education received by a farmer                           | No formal schooling                                       | 1     |
|                      |                                                                           | Up to Primary school                                      | 2     |
|                      |                                                                           | Up to High School (10 <sup>th</sup> )                     | 3     |
|                      |                                                                           | Up to Intermediate (12 <sup>th</sup> )                    | 4     |
|                      |                                                                           | Up to Graduation                                          | 5     |
|                      |                                                                           | Up to Post-graduation                                     | 6     |
| Annual income (INR)  | Income from agriculture/other sources                                     | Only agriculture                                          | 1     |
|                      |                                                                           | Two sources (e.g., agriculture and dairy)                 | 2     |
|                      |                                                                           | ≥Three (e.g., agriculture, dairy and salaried employment) | 3     |
| Total landholding    | Size of agricultural landholding (in ha)                                  | <1.0 ha                                                   | 1     |
|                      |                                                                           | 1.0–2.0 ha                                                | 2     |
|                      |                                                                           | >2.0 ha                                                   | 3     |
| Area under muskmelon | Area put under muskmelon crop (in ha)                                     | <0.40 ha                                                  | 1     |
|                      |                                                                           | 0.40–0.80 ha                                              | 2     |
|                      |                                                                           | >0.80 ha                                                  | 3     |
| Extension contact    | Contacts with research/extension functionaries and developmental agencies | Only one agency                                           | 1     |
|                      |                                                                           | Two agencies                                              | 2     |

**Table S2.** Frequency distribution of stressors and enablers vis-à-vis conservation of muskmelon landrace ‘Jaunpuri Netted’.

| Level    | Stressors |      |      |      |      |      |      | Enablers |      |      |      |      |
|----------|-----------|------|------|------|------|------|------|----------|------|------|------|------|
|          | BB        | ER   | DI   | MC   | RIA  | PIS  | CH   | SP       | SCD  | EM   | PFT  | LS   |
| Low      | 1.7       | 23.3 | 41.7 | 38.3 | 45.0 | 55.0 | 35.0 | 35.0     | 11.7 | 5.0  | 11.7 | 5.0  |
| Moderate | 95.0      | 73.3 | 50.0 | 38.3 | 50.0 | 41.7 | 48.3 | 36.7     | 45.0 | 38.3 | 26.7 | 56.7 |
| High     | 3.3       | 3.3  | 8.3  | 23.3 | 5.0  | 3.3  | 16.7 | 28.3     | 43.3 | 56.7 | 61.7 | 38.3 |

Abbreviations: BB—incidence of blue bulls, ER—erratic rainfall, DI—declining interest in farming including muskmelon cultivation, MC—market constraints, PIS—poor institutional support, CH—cultural heritage, SP—social prestige, SCD—short crop duration, EM—ease-in-management, PFT—pleasant fruit taste, LS—livelihood support.

**Table S3.** Contribution of variables (%), Eigen values, variance (%) and cumulative variance (%) explained by the first five Principal Components/Dimensions (Dim.1 to Dim.5) for stressors and enablers perceived by the muskmelon farmers. Pointed out values are shown in bold.

| Variables                  | Dim.1        | Dim.2        | Dim.3        | Dim.4        | Dim.5        |
|----------------------------|--------------|--------------|--------------|--------------|--------------|
| Blue bulls                 | 0.16         | 14.23        | <b>15.80</b> | 9.81         | 8.68         |
| Erratic rainfall           | <b>15.51</b> | 7.27         | 2.60         | 0.89         | 6.39         |
| Declining interest         | 2.17         | 7.93         | 11.90        | 8.75         | 0.63         |
| Market constraints         | <b>15.98</b> | 8.29         | 0.06         | 8.01         | 0.13         |
| Reduction in area          | 2.93         | 1.04         | <b>24.12</b> | 0.41         | <b>30.09</b> |
| Poor institutional support | <b>17.86</b> | 1.34         | 3.61         | 0.06         | 13.20        |
| Cultural heritage          | 6.53         | <b>20.34</b> | 0.15         | 4.59         | 2.28         |
| Social prestige            | <b>18.72</b> | 11.34        | 0.08         | 5.36         | 0.58         |
| Short crop duration        | 2.09         | 7.62         | 1.58         | <b>40.14</b> | 0.01         |
| Ease-in-management         | 11.31        | 5.61         | 4.04         | <b>17.44</b> | 13.95        |
| Pleasant fruit taste       | 5.96         | 8.22         | 8.53         | 3.30         | 1.89         |
| Livelihood support         | 0.79         | 6.77         | <b>27.55</b> | 1.24         | <b>22.17</b> |
| Eigen value                | 2.55         | 2.07         | 1.59         | 1.13         | 1.08         |
| Variance (%)               | 21.21        | 17.25        | 13.23        | 9.38         | 9.04         |
| Cumulative variance (%)    | 21.21        | 38.46        | 51.69        | 61.07        | 70.11        |

**Table S4.** Temporal reduction in muskmelon crop area over 1992-2017.

| Year | Area (sq. km) | Decrease (%) |
|------|---------------|--------------|
| 1992 | 5.91          | ---          |
| 1997 | 5.81          | 1.69         |
| 2002 | 3.48          | 41.12        |
| 2007 | 3.40          | 42.47        |
| 2013 | 3.38          | 42.81        |
| 2017 | 2.66          | 54.99        |
